# Supplementary material for: Thermally stable carbazole tagged Au(i)–mesoionic N-heterocyclic carbene complexes with diverse gold–hydrogen bonds
Source: Royal Society of Chemistry journal article supplement (doi:10.1039/d2nj03215e), 2022-11-22
Supplement: d2nj03215e1.pdf [file d2nj03215e1.pdf]

## Thermally Stable Carbazole Tagged Au(I)- Mesoionic N-Heterocyclic Carbene Complexes with Diverse Gold-Hydrogen Bonds

Subramaniyam Kalaivanan,<sup>a</sup> Vaddamanu Moulali,<sup>a</sup> Kumar Siddhant,<sup>b</sup> Kavitha Velappan,<sup>c</sup> Kyohei Hisano,<sup>b</sup> Osamu Tsutsumi<sup>\*b</sup> and Ganesan Prabusankar<sup>\*,a</sup>

<sup>a</sup>Department of Chemistry, Indian Institute of Technology Hyderabad, Hyderabad, Kandi, Telangana, INDIA 502285. E-mail: [prabu@chy.iith.ac.in](mailto:prabu@chy.iith.ac.in)

<sup>b</sup>Department of Applied Chemistry, Ritsumeikan University, Kusatsu 525-8577, JAPAN. E-mail: [tsutsumi@sk.ritsumei.ac.jp](mailto:tsutsumi@sk.ritsumei.ac.jp)

<sup>c</sup>DAV-IITH, Indian Institute of Technology Hyderabad, Kandi, Telangana, INDIA-502 284.

### Supporting Information

| Contents   | Table of contents                                                                                | Page. No |
|------------|--------------------------------------------------------------------------------------------------|----------|
| Figure S1  | FT-IR (neat, $\bar{\nu}$ ) spectrum of <b>L<sup>1</sup>.HI</b> .                                 | 2        |
| Figure S2  | <sup>1</sup> H NMR spectrum of <b>L<sup>1</sup>.HI</b> in DMSO- <i>d</i> <sub>6</sub> at 27 °C.  | 3        |
| Figure S3  | <sup>13</sup> C NMR spectrum of <b>L<sup>1</sup>.HI</b> in DMSO- <i>d</i> <sub>6</sub> at 27 °C. | 4        |
| Figure S4  | FT-IR (neat, $\bar{\nu}$ ) spectrum of <b>L<sup>2</sup>.HI</b> .                                 | 5        |
| Figure S5  | <sup>1</sup> H NMR spectrum of <b>L<sup>2</sup>.HI</b> in DMSO- <i>d</i> <sub>6</sub> at 27 °C.  | 6        |
| Figure S6  | <sup>13</sup> C NMR spectrum of <b>L<sup>2</sup>.HI</b> in DMSO- <i>d</i> <sub>6</sub> at 27 °C. | 7        |
| Figure S7  | FT-IR (neat, $\bar{\nu}$ ) spectrum of <b>1</b> .                                                | 8        |
| Figure S8  | <sup>1</sup> H NMR spectrum of <b>1</b> in CDCl <sub>3</sub> at 27 °C.                           | 9        |
| Figure S9  | <sup>13</sup> C NMR spectrum of <b>1</b> in CDCl <sub>3</sub> at 27 °C.                          | 10       |
| Figure S10 | FT-IR (neat, $\bar{\nu}$ ) spectrum of <b>2</b> .                                                | 11       |
| Figure S11 | <sup>1</sup> H NMR spectrum of <b>2</b> in CDCl <sub>3</sub> at 27 °C.                           | 12       |
| Figure S12 | <sup>13</sup> C NMR spectrum of <b>2</b> in CDCl <sub>3</sub> at 27 °C.                          | 13       |
| Figure S13 | The solid-state structure of <b>L<sup>1</sup>.HI</b> .                                           | 13       |
| Figure S14 | Contour line diagrams of the Laplacian distribution $\nabla^2\rho(r)$ of <b>1A</b> .             | 14       |
| Table S1   | Cartesian Coordinates of <b>1A</b> .                                                             | 15       |
| Table S2   | Excitation energies and oscillator strengths of <b>1A</b> .                                      | 17       |
| Table S3   | Nature of bonding Au-Carbene bond (from NBO analysis) of <b>1A</b> .                             | 20       |
| Table S4   | Crystallographic data for <b>L<sup>1</sup>.HI</b> .                                              | 20       |
| Table S5   | The selected bond lengths (Å) and angles (°) and of <b>L<sup>1</sup>.HI</b> .                    | 21       |

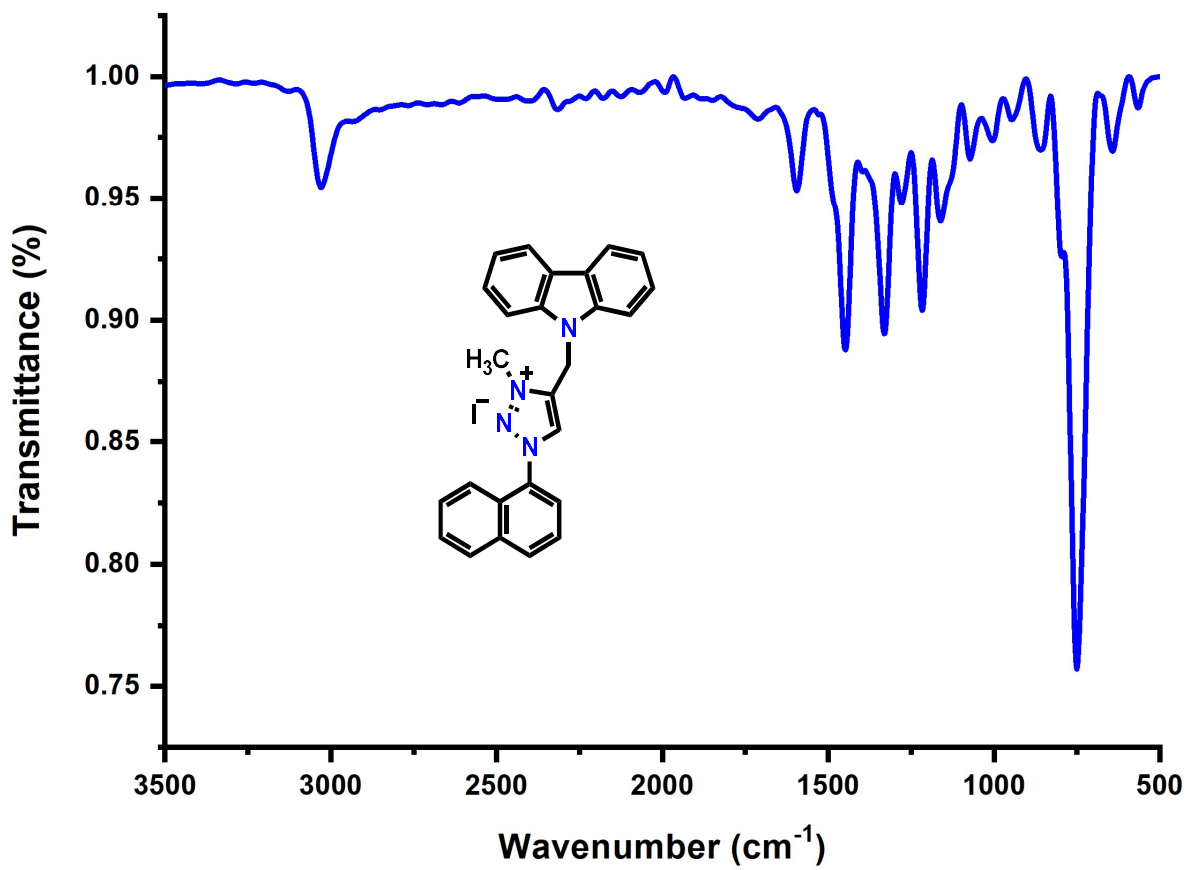

Fig. S1. FT-IR (neat,  $\bar{\nu}$ ) spectrum of L<sup>1</sup>.HI.

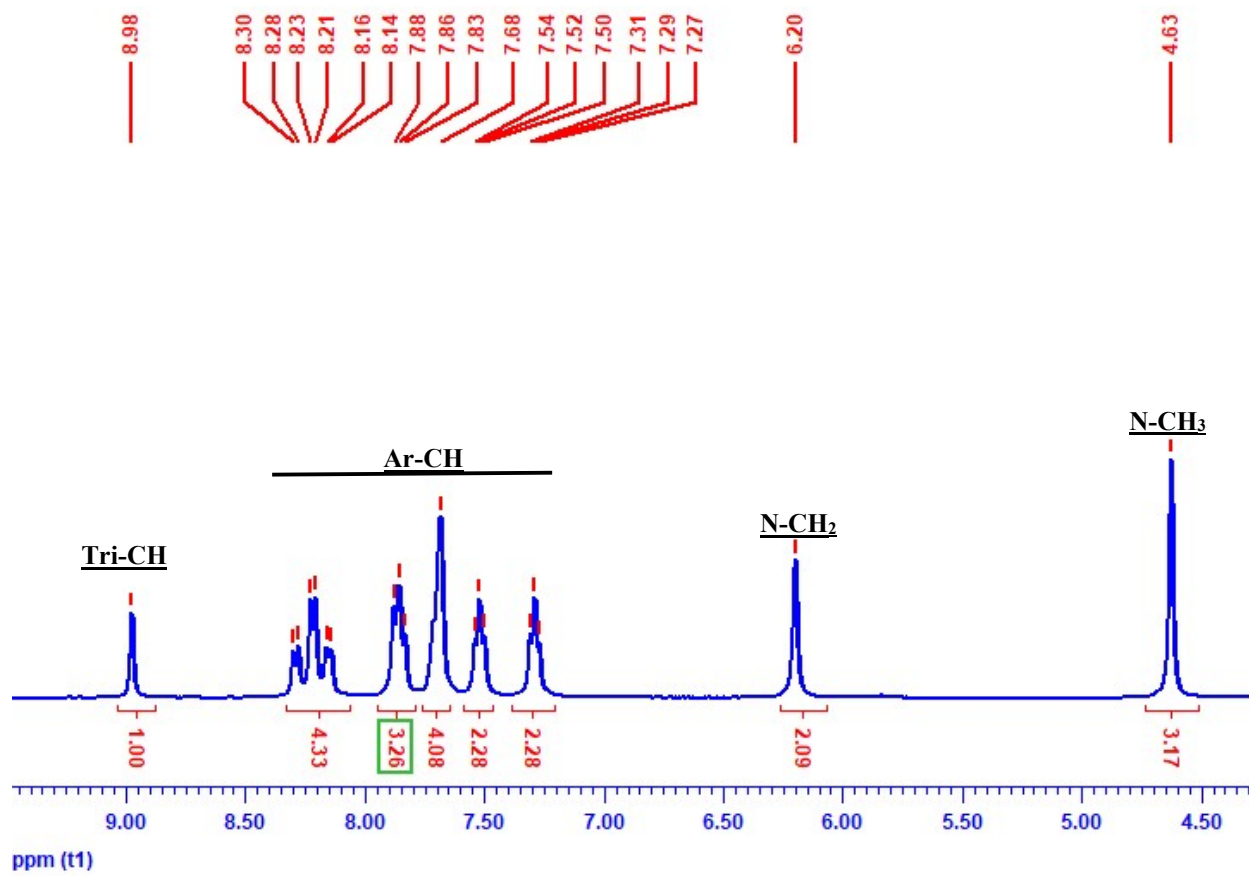

Fig. S2.  $^1\text{H}$  NMR spectrum of  $\text{L}^1\cdot\text{HI}$  in  $\text{DMSO-}d_6$  at  $27\text{ }^\circ\text{C}$ .

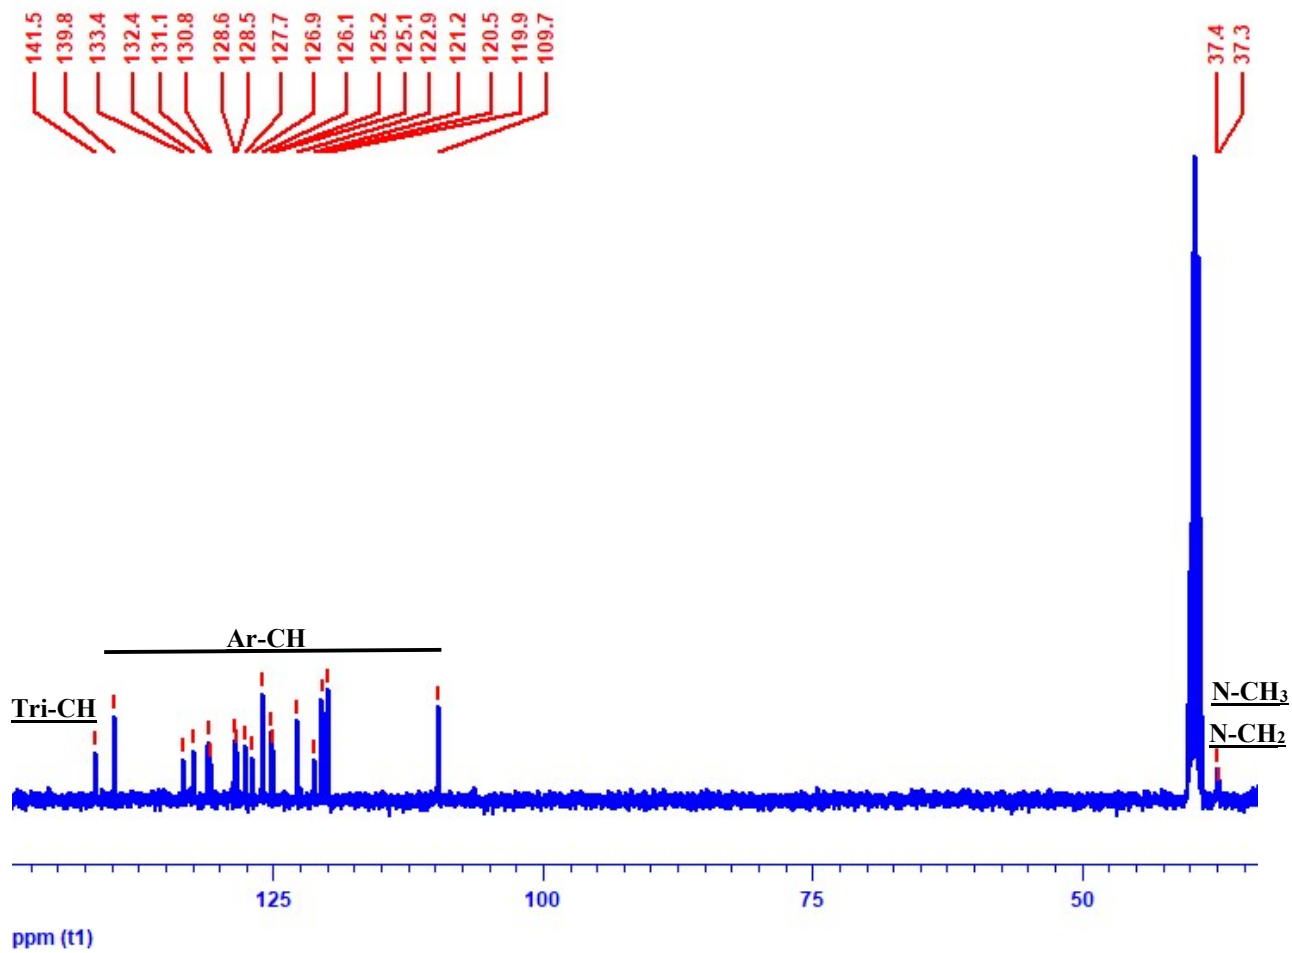

Fig. S3.  $^{13}\text{C}$  NMR spectrum of  $\text{L}^1\cdot\text{HI}$  in  $\text{DMSO-}d_6$  at  $27^\circ\text{C}$ .

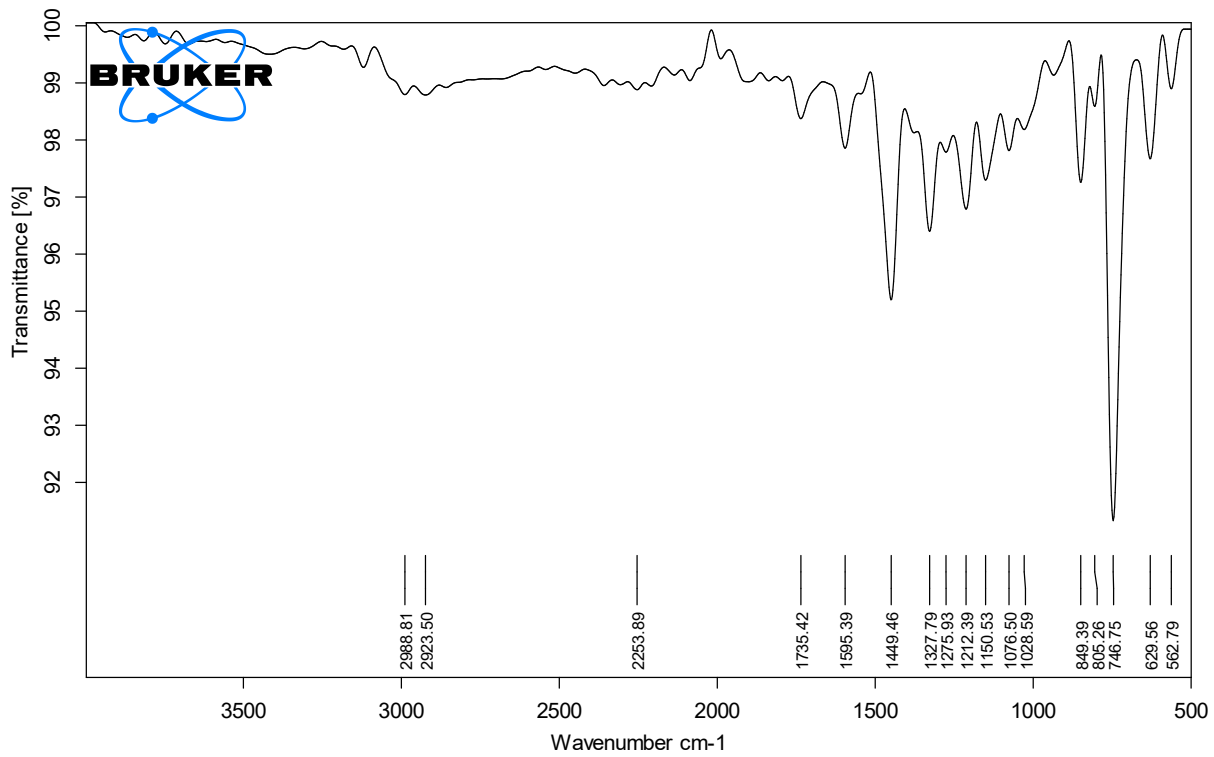

**Fig. S4.** FT-IR (neat,  $\bar{\nu}$ ) spectrum of L<sup>2</sup>.HI.

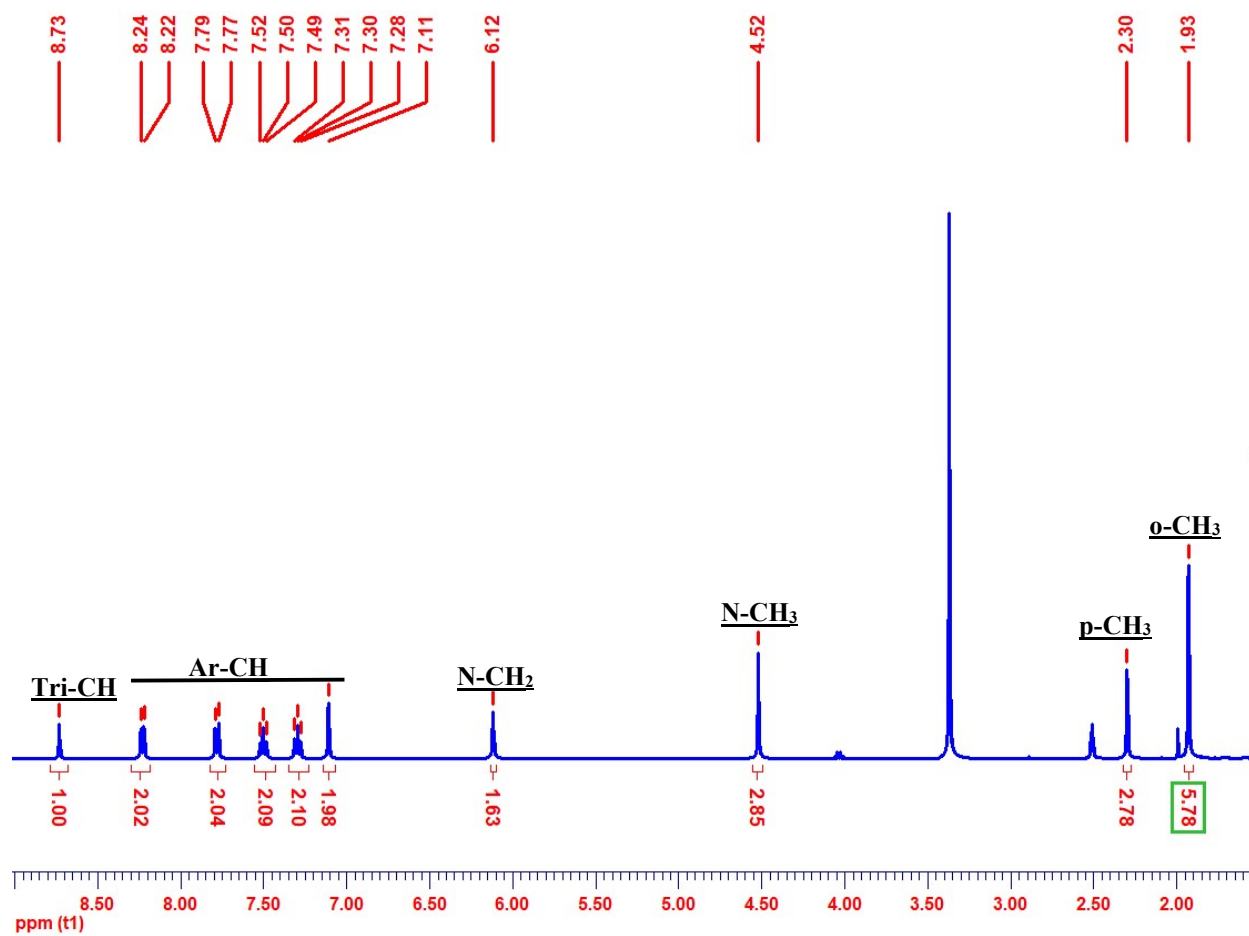

Fig. S5.  $^1\text{H}$  NMR spectrum of  $\text{L}^2\cdot\text{HI}$  in  $\text{DMSO-}d_6$  at  $27^\circ\text{C}$ .

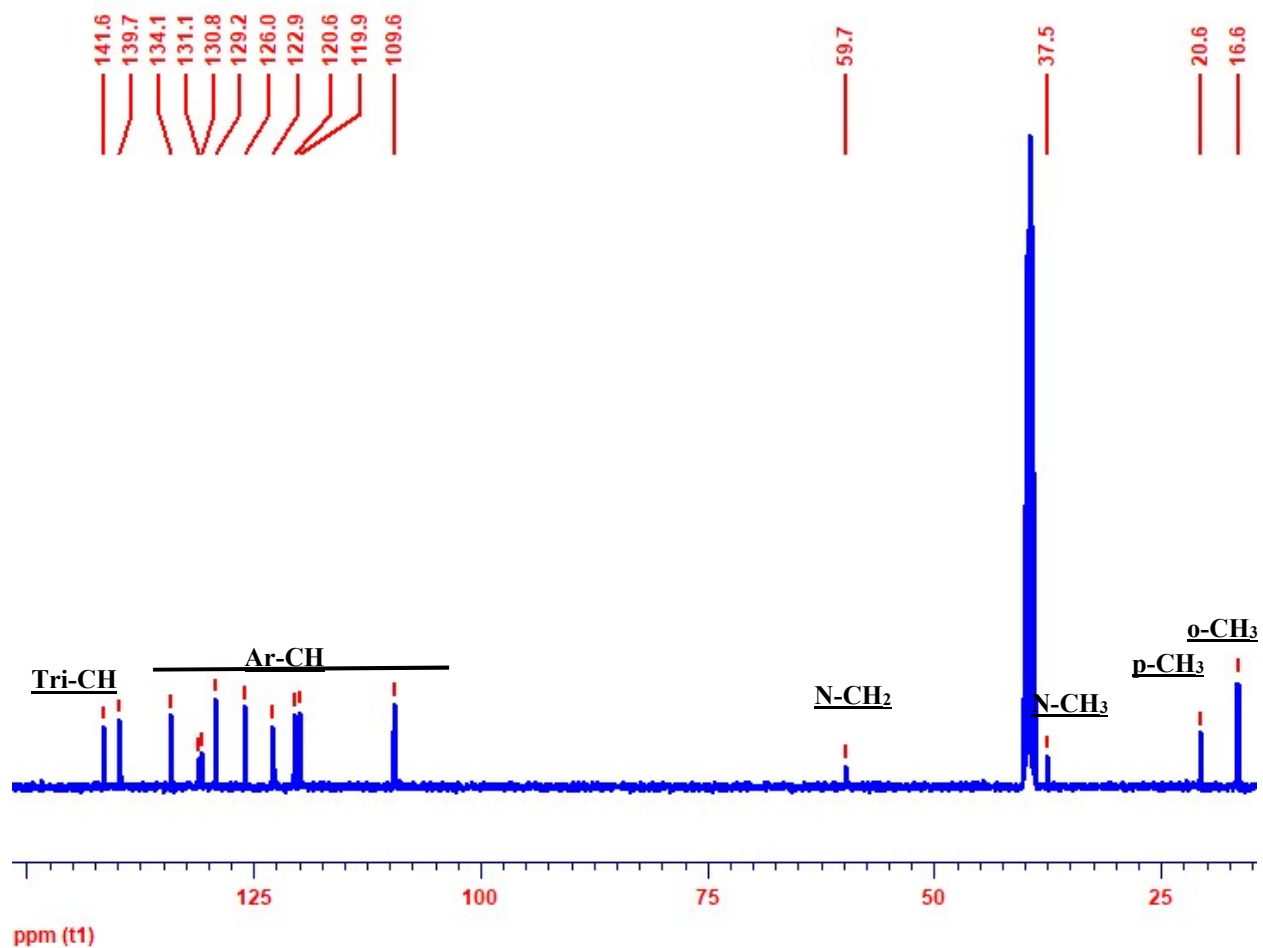

Fig. S6. <sup>13</sup>C NMR spectrum of L<sup>2</sup>.HI in DMSO-*d*<sub>6</sub> at 27 °C.

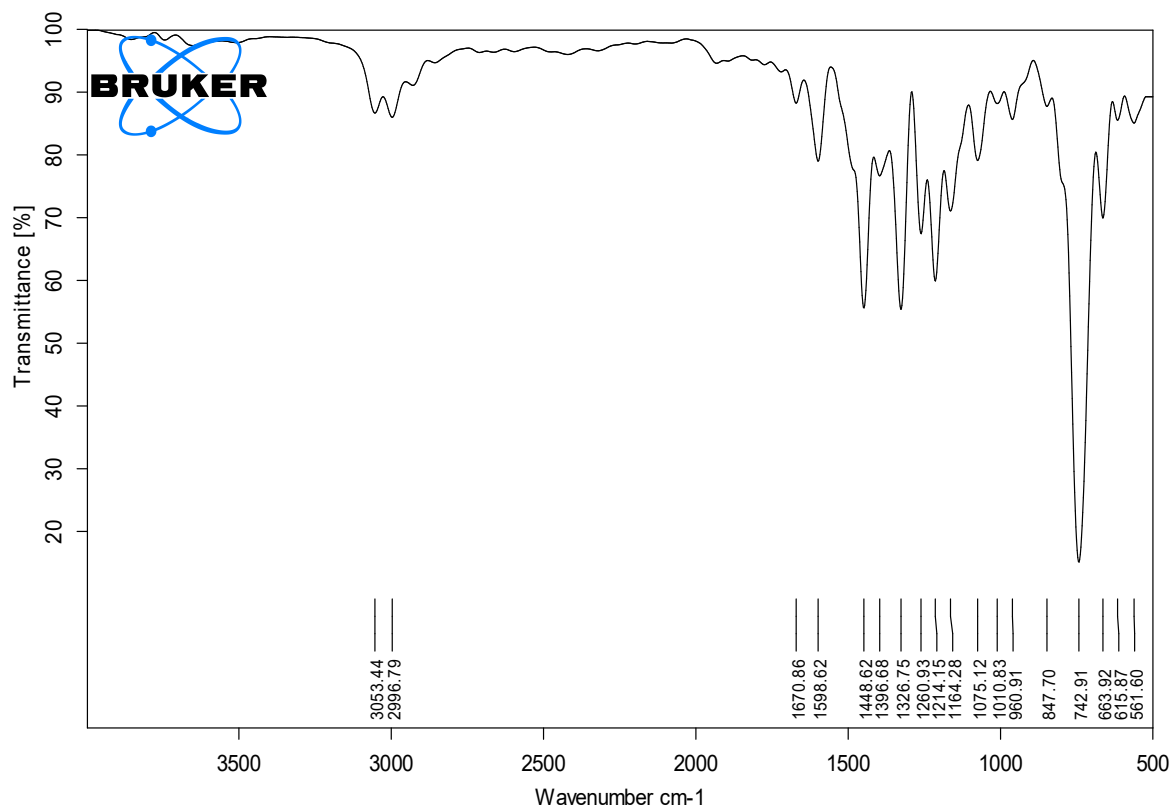

**Fig. S7.** FT-IR (neat,  $\bar{\nu}$ ) spectrum of **1**.



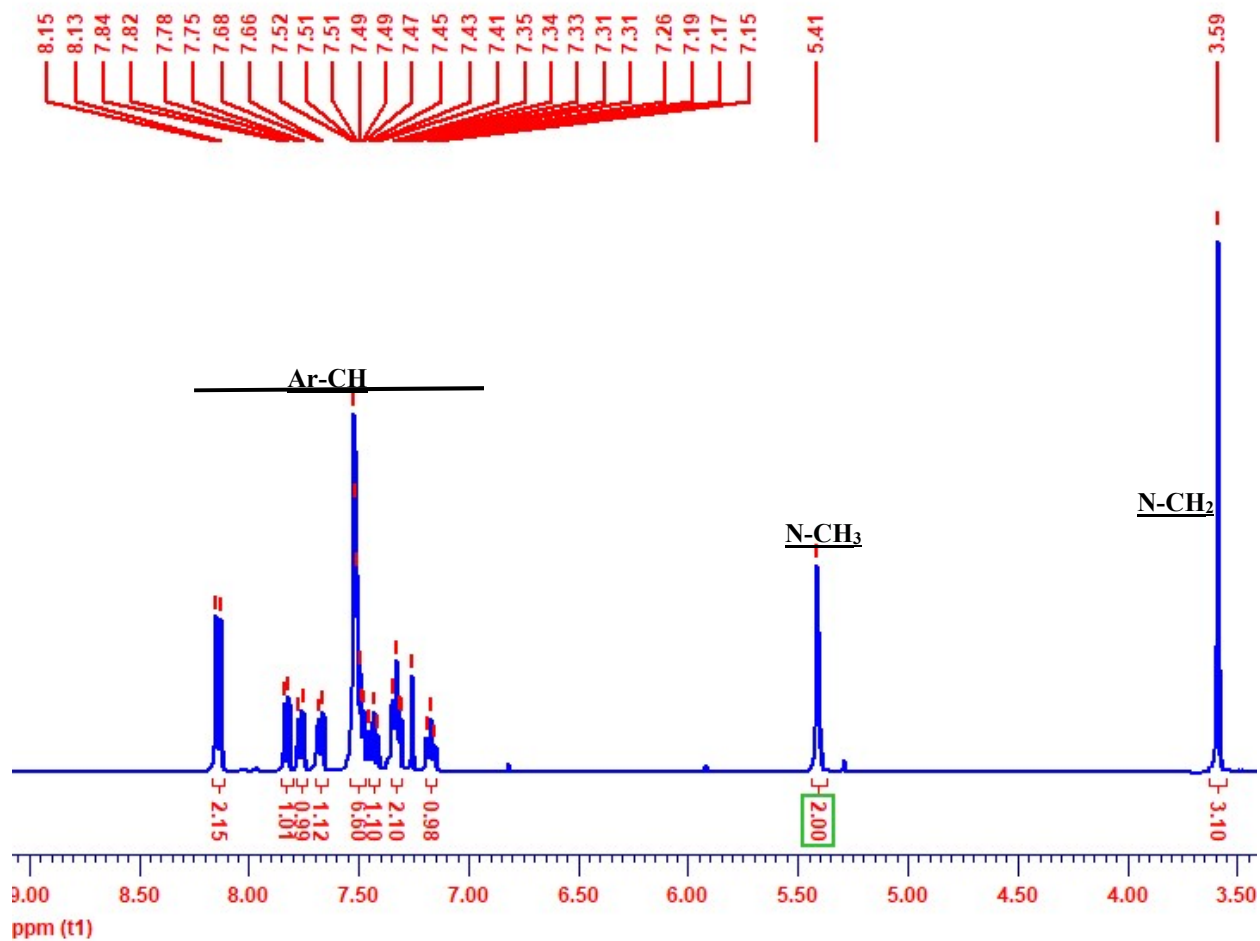

Fig. S8.  $^1\text{H}$  NMR spectrum of **1** in  $\text{CDCl}_3$  at  $27\text{ }^\circ\text{C}$ .

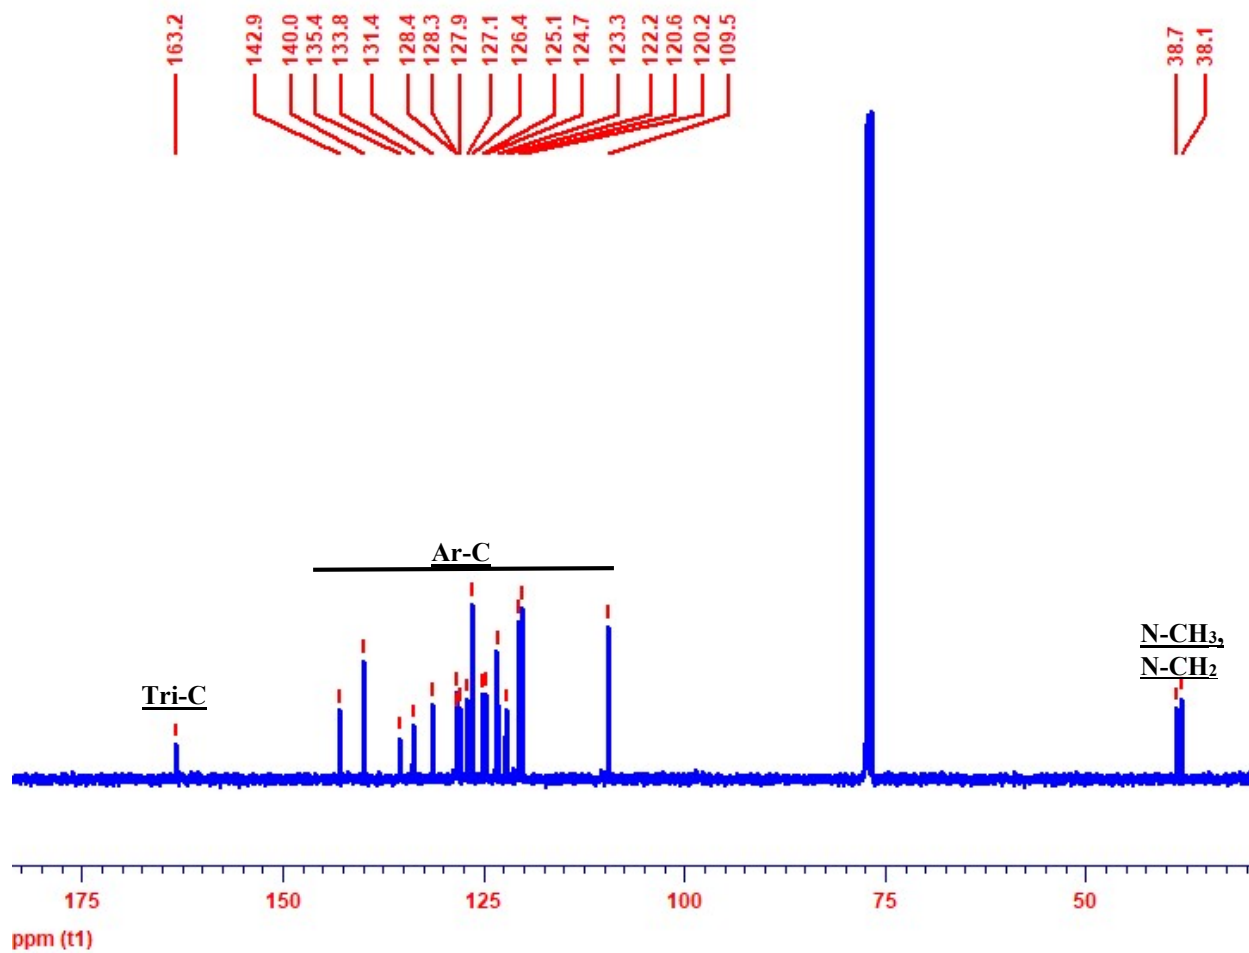

Fig. S9.  $^{13}\text{C}$  NMR spectrum of **1** in  $\text{CDCl}_3$  at 27 °C.

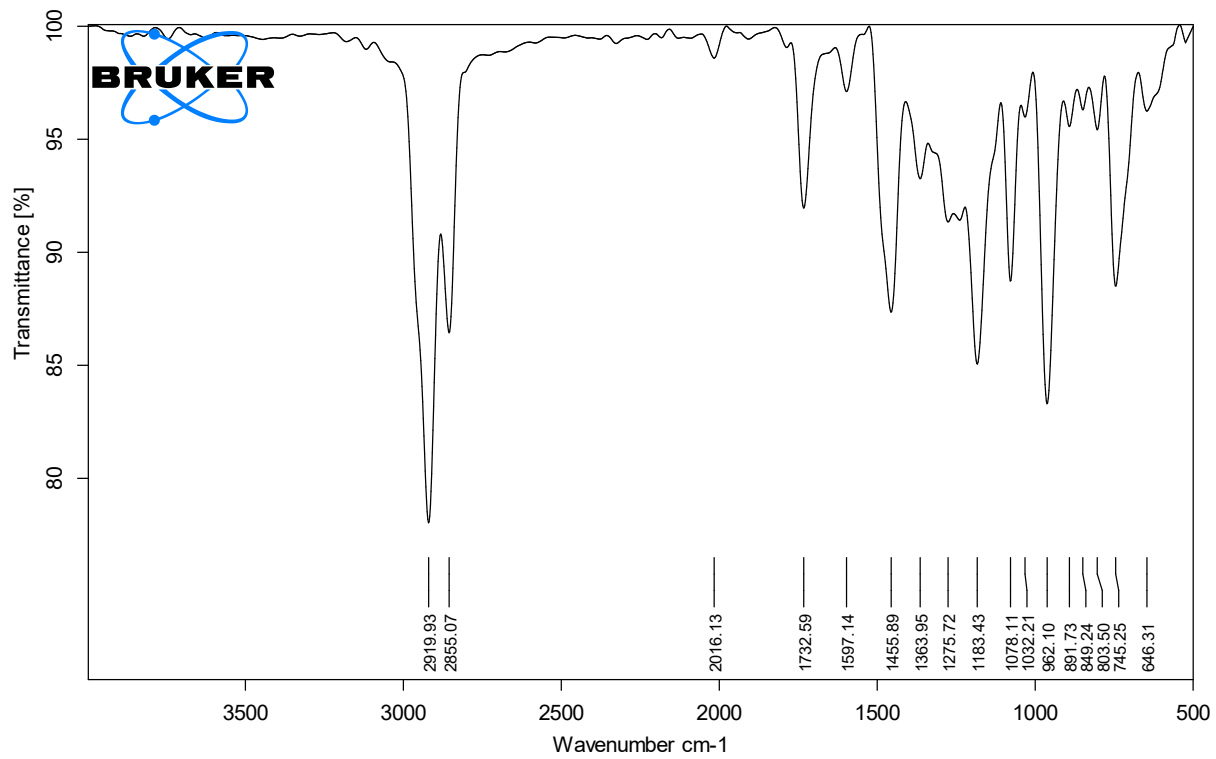

**Fig. S10.** FT-IR (neat,  $\bar{\nu}$ ) spectrum of **2**.

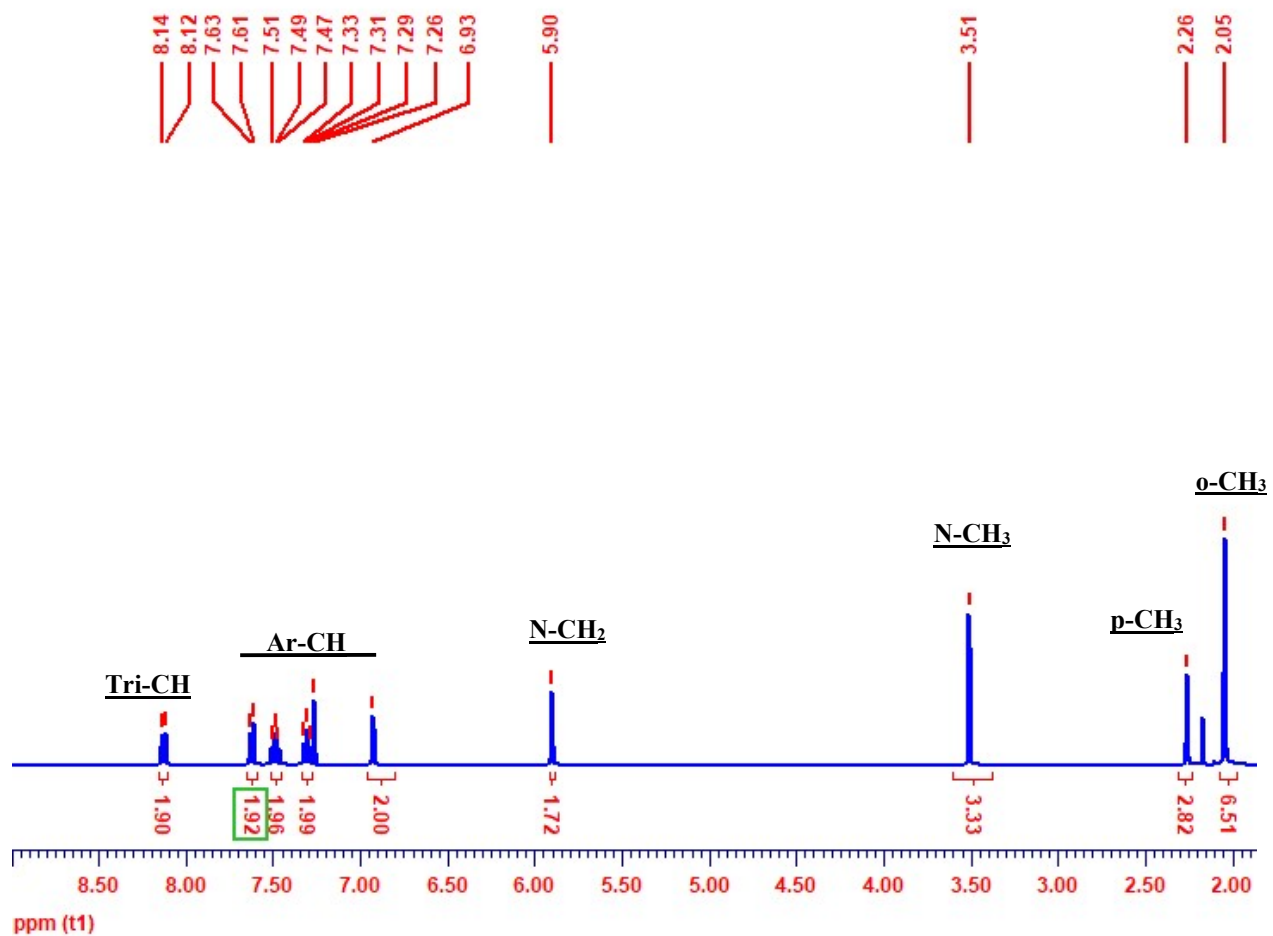

**Fig. S11.**  $^1\text{H}$  NMR spectrum of **2** in  $\text{CDCl}_3$  at  $27^\circ\text{C}$ .

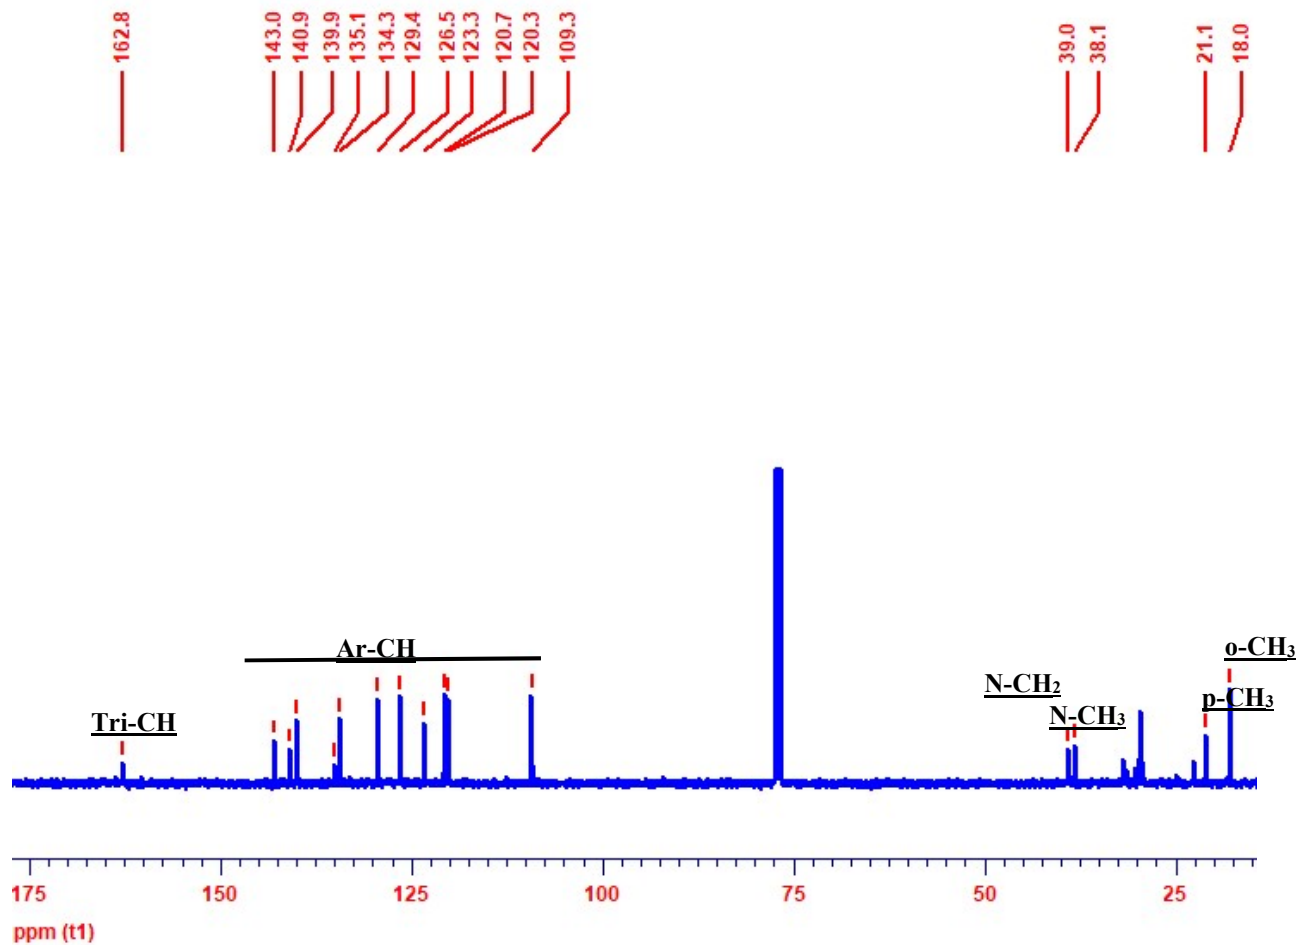

Fig. S12.  $^{13}\text{C}$  NMR spectrum of **2** in  $\text{CDCl}_3$  at 27  $^\circ\text{C}$ .

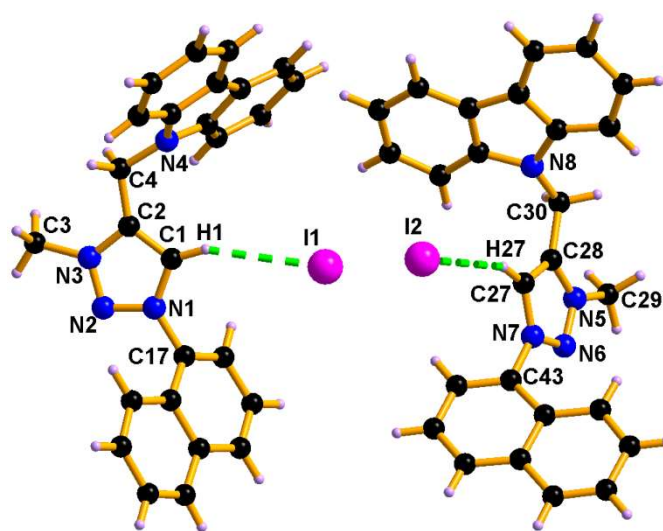

Figure S13. The solid-state structure of  $\text{L}^1\cdot\text{HI}$ .

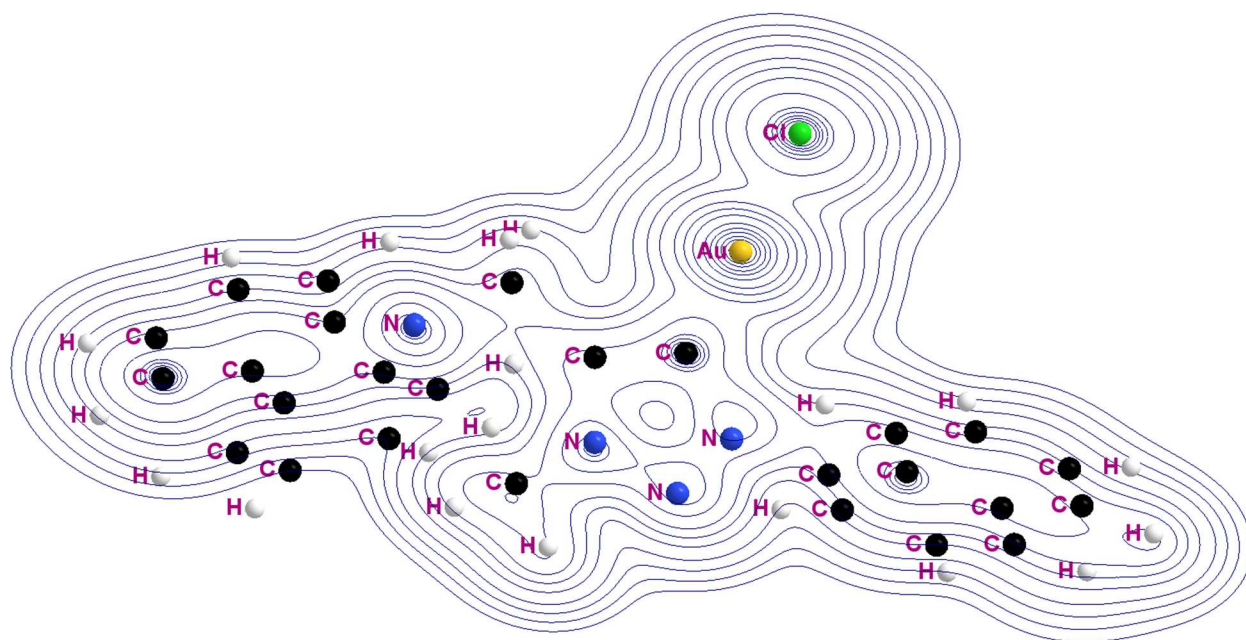

**Fig. S14.** Contour line diagrams of the Laplacian distribution  $\nabla^2\rho(r)$  of **1A**.

**Table S1.** Cartesian Coordinates of **1A**.

| <b>ATOM</b> | <b>X</b>      | <b>Y</b>     | <b>Z</b>      |
|-------------|---------------|--------------|---------------|
| Au          | 3.5055581876  | 5.1288217905 | 15.880062006  |
| Cl          | 3.6106410045  | 5.0287909829 | 18.1870442556 |
| N           | 6.873217111   | 5.5405005841 | 12.4707314104 |
| N           | 2.4078611635  | 4.8729870506 | 13.0439382004 |
| N           | 3.8915446322  | 5.4861785066 | 11.7087669133 |
| N           | 2.6587717968  | 5.0209263049 | 11.7422787673 |
| C           | 7.6936166473  | 6.1866188919 | 11.5444767074 |
| C           | 5.813317766   | 6.1499372149 | 13.2532605707 |
| H           | 5.8531386767  | 7.2310880591 | 13.0910957844 |
| H           | 5.9834784862  | 5.9899751159 | 14.3239421798 |
| C           | 3.4563831896  | 5.2179701819 | 13.8721746184 |
| C           | 7.2657430208  | 4.2026807568 | 12.5604479177 |
| C           | -0.032811428  | 5.200586279  | 13.3088513497 |
| C           | 8.6078243423  | 5.2412335074 | 11.0039616915 |
| C           | 4.4319903711  | 5.6238528316 | 12.9581347207 |
| C           | 0.009346161   | 6.5391218666 | 12.8315494177 |
| H           | 0.9578566094  | 6.9720625839 | 12.5341958476 |
| C           | 1.1144514122  | 4.3644697709 | 13.4336675523 |
| C           | 7.7033873192  | 7.5259449912 | 11.1365543577 |
| H           | 7.0244283996  | 8.2617475785 | 11.5571639973 |
| C           | 8.3337756521  | 3.9744860177 | 11.6539801763 |
| C           | -1.2937555079 | 4.6471977092 | 13.7143062256 |
| C           | -1.3460001854 | 3.3207584019 | 14.2229050211 |
| H           | -2.3072587409 | 2.9188309047 | 14.5313608339 |
| C           | 4.4986906834  | 5.7322557688 | 10.3985435204 |
| H           | 5.2872881814  | 5.0006338896 | 10.2153562489 |
| H           | 4.924007365   | 6.7364201019 | 10.3719187225 |
| H           | 3.7104574959  | 5.6357385208 | 9.6533356979  |
| C           | 1.0432886128  | 3.0851385396 | 13.9357810039 |
| H           | 1.9476279597  | 2.49396584   | 14.0308294028 |
| C           | 6.7628948355  | 3.1880406681 | 13.3828709567 |
| H           | 5.9615026286  | 3.3691418569 | 14.0919145344 |
| C           | 9.5362498265  | 5.6517254159 | 10.0387279548 |
| H           | 10.2431148257 | 4.9411678559 | 9.6196027084  |
| C           | 8.8988641756  | 2.6953329287 | 11.5638576119 |
| H           | 9.719251717   | 2.5012356452 | 10.878624227  |
| C           | -0.2054305254 | 2.5572034375 | 14.3372138718 |
| H           | -0.2533432867 | 1.5498877183 | 14.7377449757 |
| C           | -2.4619602374 | 5.4515916268 | 13.6074967014 |
| H           | -3.4146605518 | 5.0277960579 | 13.9135145481 |
| C           | 8.6400101808  | 7.9087903075 | 10.1738768285 |
| H           | 8.6695552918  | 8.9445764042 | 9.8485562893  |

|   |               |              |               |
|---|---------------|--------------|---------------|
| C | 7.3467399203  | 1.9248429325 | 13.2747000248 |
| H | 6.9823854234  | 1.120052363  | 13.9062480572 |
| C | 8.3992725237  | 1.6765032862 | 12.3738558007 |
| H | 8.8306718102  | 0.6817737059 | 12.3170643271 |
| C | 9.5468421089  | 6.9837464263 | 9.6260493941  |
| H | 10.2642424059 | 7.3136103487 | 8.8810045653  |
| C | -1.1429012135 | 7.2910673485 | 12.7493006421 |
| H | -1.0939462248 | 8.3142997898 | 12.3886911178 |
| C | -2.391673423  | 6.7434101552 | 13.1349354091 |
| H | -3.2905485965 | 7.3482831776 | 13.0625343347 |



**Table S2.** Excitation energies and oscillator strengths of **1A**.

| Orbitals involved in the transition |                | Energy, eV | Wavelength, nm | Oscillator strength |
|-------------------------------------|----------------|------------|----------------|---------------------|
| HOMO-1→LUMO                         | 0.23578 (11%)  | 3.3781     | 367.03 nm      | 0.0011              |
| HOMO→LUMO                           | 0.63523 (80%)  |            |                |                     |
| HOMO→LUMO+1                         | -0.16777 (5%)  |            |                |                     |
| HOMO-2→LUMO                         | -0.11807 (2%)  | 3.4773     | 356.56 nm      | 0.0227              |
| HOMO-1→LUMO                         | 0.63943 (82%)  |            |                |                     |
| HOMO→LUMO                           | -0.26146 (13%) |            |                |                     |
| HOMO-5→LUMO                         | 0.66387 (88%)  | 3.9724     | 312.12 nm      | 0.0105              |
| HOMO-5→LUMO+1                       | -0.13657 (4%)  |            |                |                     |
| HOMO-4→LUMO+1                       | 0.10155 (2%)   |            |                |                     |
| HOMO-3→LUMO+5                       | 0.15806 (5%)   | 3.9860     | 311.05 nm      | 0.0404              |
| HOMO-2→LUMO+2                       | -0.15748 (5%)  |            |                |                     |
| HOMO-1→LUMO+2                       | 0.27826 (15%)  |            |                |                     |
| HOMO→LUMO+2                         | 0.59044 (70%)  |            |                |                     |
| HOMO-5→LUMO+1                       | 0.27918 (15%)  | 4.1663     | 297.59 nm      | 0.0337              |
| HOMO-4→LUMO                         | 0.19758 (8%)   |            |                |                     |
| HOMO-4→LUMO+1                       | 0.60575 (73%)  |            |                |                     |
| HOMO-6→LUMO                         | 0.16506 (5%)   | 4.3583     | 284.48 nm      | 0.0462              |
| HOMO-6→LUMO+1                       | 0.14636 (4%)   |            |                |                     |
| HOMO-5→LUMO                         | 0.11686 (2%)   |            |                |                     |
| HOMO-5→LUMO+1                       | 0.53224 (56%)  |            |                |                     |
| HOMO-4→LUMO+1                       | -0.22736 (10%) |            |                |                     |
| HOMO-4→LUMO+3                       | 0.23526 (11%)  |            |                |                     |
| HOMO-6→LUMO                         | 0.36485 (27%)  | 4.3987     | 281.86 nm      | 0.0103              |
| HOMO-6→LUMO+1                       | 0.26317 (14%)  |            |                |                     |
| HOMO-5→LUMO+1                       | -0.31630 (20%) |            |                |                     |
| HOMO-5→LUMO+3                       | -0.13741 (4%)  |            |                |                     |
| HOMO-4→LUMO+3                       | 0.34018 (23%)  |            |                |                     |
| HOMO-2→LUMO+3                       | 0.11074 (2%)   |            |                |                     |
| HOMO-1→LUMO+3                       | -0.10386 (2%)  |            |                |                     |
| HOMO-3→LUMO+2                       | 0.60943 (74%)  | 4.4254     | 280.17 nm      | 0.1050              |
| HOMO-1→LUMO+5                       | -0.12546 (3%)  |            |                |                     |
| HOMO→LUMO+4                         | -0.12766 (3%)  |            |                |                     |
| HOMO→LUMO+5                         | -0.23419 (11%) |            |                |                     |
| HOMO-1→LUMO+3                       | 0.50073 (50%)  | 4.5022     | 275.39 nm      | 0.0132              |
| HOMO→LUMO+3                         | -0.48471 (47%) |            |                |                     |
| HOMO-6→LUMO                         | 0.38642 (30%)  | 4.6358     | 267.45 nm      | 0.0180              |
| HOMO-6→LUMO+1                       | -0.23992 (11%) |            |                |                     |
| HOMO-2→LUMO+3                       | -0.31362 (20%) |            |                |                     |
| HOMO-1→LUMO+3                       | 0.27374 (15%)  |            |                |                     |

|                |                |        |           |        |
|----------------|----------------|--------|-----------|--------|
| HOMO→LUMO+3    | 0.29188 (17%)  |        |           |        |
| HOMO-2→LUMO+4  | -0.12440 (3%)  | 4.7779 | 259.49 nm | 0.0220 |
| HOMO-1→LUMO+4  | 0.24208 (12%)  |        |           |        |
| HOMO→LUMO+3    | 0.12178 (3%)   |        |           |        |
| HOMO→LUMO+4    | 0.58781 (69%)  |        |           |        |
| HOMO→LUMO+5    | -0.11525 (2%)  |        |           |        |
| HOMO-10→LUMO   | 0.12595 (3%)   | 4.9443 | 250.76 nm | 0.0126 |
| HOMO-2→LUMO+6  | -0.12130 (3%)  |        |           |        |
| HOMO-1→LUMO+4  | 0.58432 (69%)  |        |           |        |
| HOMO-1→LUMO+6  | -0.16570 (5%)  |        |           |        |
| HOMO→LUMO+4    | -0.24414 (12%) |        |           |        |
| HOMO-2→LUMO+4  | -0.23190 (11%) | 5.0156 | 247.20 nm | 0.0703 |
| HOMO-2→LUMO+6  | -0.22331 (10%) |        |           |        |
| HOMO-1→LUMO+6  | 0.54438 (59%)  |        |           |        |
| HOMO→LUMO+5    | 0.15014 (4%)   |        |           |        |
| HOMO-6→LUMO+1  | -0.12540 (3%)  | 5.0354 | 246.23 nm | 0.0229 |
| HOMO-5→LUMO+3  | 0.53384 (57%)  |        |           |        |
| HOMO-4→LUMO+3  | 0.36107 (26%)  |        |           |        |
| HOMO-4→LUMO+6  | 0.11527 (2%)   |        |           |        |
| HOMO→LUMO+6    | 0.10812 (2%)   |        |           |        |
| HOMO-7→LUMO+2  | -0.10274 (2%)  | 5.0639 | 244.84 nm | 0.1132 |
| HOMO-3→LUMO+2  | -0.11944 (2%)  |        |           |        |
| HOMO-3→LUMO+3  | 0.13276 (3%)   |        |           |        |
| HOMO-3→LUMO+4  | 0.48306 (46%)  |        |           |        |
| HOMO-3→LUMO+11 | 0.11017 (2%)   |        |           |        |
| HOMO-2→LUMO+6  | -0.10265 (2%)  |        |           |        |
| HOMO-1→LUMO+5  | -0.10048 (2%)  |        |           |        |
| HOMO→LUMO+5    | -0.34137 (23%) |        |           |        |
| HOMO-2→LUMO+4  | 0.53354 (57%)  | 5.0717 | 244.46 nm | 0.0375 |
| HOMO-2→LUMO+6  | 0.23293 (11%)  |        |           |        |
| HOMO-1→LUMO+4  | 0.11770 (2%)   |        |           |        |
| HOMO-1→LUMO+6  | 0.29529 (17%)  |        |           |        |
| HOMO-11→LUMO   | 0.10537 (2%)   | 5.0855 | 243.80 nm | 0.1585 |
| HOMO-7→LUMO+1  | -0.13375 (3%)  |        |           |        |
| HOMO-3→LUMO+2  | 0.13975 (3%)   |        |           |        |
| HOMO-3→LUMO+4  | 0.43364 (37%)  |        |           |        |
| HOMO-1→LUMO+5  | 0.11409 (2%)   |        |           |        |
| HOMO-1→LUMO+6  | -0.12897 (3%)  |        |           |        |
| HOMO→LUMO+5    | 0.34888 (24%)  |        |           |        |
| HOMO-11→LUMO   | -0.29855 (18%) | 5.0977 | 243.22 nm | 0.0341 |
| HOMO-11→LUMO+1 | -0.14850 (4%)  |        |           |        |

|               |               |  |  |  |
|---------------|---------------|--|--|--|
| HOMO-9→LUMO+1 | 0.17662 (6%)  |  |  |  |
| HOMO-7→LUMO   | 0.11778 (2%)  |  |  |  |
| HOMO-7→LUMO+1 | 0.49310 (48%) |  |  |  |
| HOMO-6→LUMO+1 | 0.16565 (5%)  |  |  |  |
| HOMO→LUMO+5   | 0.15341 (5%)  |  |  |  |

**Table S3.** Nature of bonding Au-Carbene bond (from NBO analysis) of **1A**.

| NBO                       | Occupancy | Coefficients |             | Hybrids                                             |
|---------------------------|-----------|--------------|-------------|-----------------------------------------------------|
| $\sigma_{\text{Au1-C11}}$ | 1.95744   | 23.35%       | 0.4832* Au1 | s(78.86%)p 0.04(3.11%)d<br>0.23(17.95%)f0.00(0.09%) |
|                           |           | 76.65%       | 0.8755* C11 | s(37.83%)p 1.64(62.17%)d 0.00(0.00%)                |

**Table S4.** Crystallographic data for **L<sup>1</sup>.HI**.

| Identification code                         | <b>L<sup>1</sup>.HI</b>                                       |
|---------------------------------------------|---------------------------------------------------------------|
| Empirical formula                           | C <sub>26</sub> H <sub>21</sub> IN <sub>4</sub>               |
| Formula weight                              | 516.388                                                       |
| Temperature/K                               | 298.0                                                         |
| Crystal system                              | monoclinic                                                    |
| Space group                                 | P2 <sub>1</sub> /c                                            |
| a/Å                                         | 7.2137(3)                                                     |
| b/Å                                         | 27.0679(10)                                                   |
| c/Å                                         | 22.9078(7)                                                    |
| $\alpha$ /°                                 | 90                                                            |
| $\beta$ /°                                  | 90.190(3)                                                     |
| $\gamma$ /°                                 | 90                                                            |
| Volume/Å <sup>3</sup>                       | 4473.0(3)                                                     |
| Z                                           | 8                                                             |
| $\rho_{\text{calcd}}$ g/cm <sup>3</sup>     | 1.534                                                         |
| $\mu$ /mm <sup>-1</sup>                     | 1.452                                                         |
| F (000)                                     | 2061.9                                                        |
| Crystal size/mm <sup>3</sup>                | 0.074 × 0.054 × 0.016                                         |
| Radiation                                   | Mo K $\alpha$ ( $\lambda$ = 0.71073)                          |
| 2 $\Theta$ range for data collection/°      | 5.64 to 58.28                                                 |
| Index ranges                                | -9 ≤ h ≤ 8, -31 ≤ k ≤ 36, -31 ≤ l ≤ 24                        |
| Reflections collected                       | 38669                                                         |
| Independent reflections                     | 9968 [R <sub>int</sub> = 0.0579, R <sub>sigma</sub> = 0.0481] |
| Data/restraints/parameters                  | 9968/0/561                                                    |
| Goodness-of-fit on F <sup>2</sup>           | 1.022                                                         |
| Final R indexes [I ≥ 2 $\sigma$ (I)]        | R <sub>1</sub> = 0.0345, wR <sub>2</sub> = 0.0738             |
| Final R indexes [all data]                  | R <sub>1</sub> = 0.0540, wR <sub>2</sub> = 0.0800             |
| Largest diff. peak/hole / e Å <sup>-3</sup> | 0.87/-0.75                                                    |

**Table S5.** The selected bond lengths (Å) and angles (°) and of **L<sup>1</sup>.III**.

---

| Bond Lengths (Å) |            |
|------------------|------------|
| N3-N2            | 1.314(3)   |
| N3-C2            | 1.355(3)   |
| N3-C3            | 1.451(3)   |
| N1-N2            | 1.327(3)   |
| N1-C1            | 1.354(3)   |
| N1-C17           | 1.442(3)   |
| C1-C2            | 1.362(4)   |
| C2-C4            | 1.486(4)   |
| Au1-Cl1          | -          |
| Au1-C1           | -          |
| Bond Angles (°)  |            |
| C1-N1-C17        | 128.8(2)   |
| C1-C2-C4         | 134.0(2)   |
| N2-N3-C2         | 113.1(2)   |
| N2-N1-C1         | 112.4(2)   |
| N1-C1-C2         | 105.6(2)   |
| N3-C2-C1         | 105.0(2)   |
| N3-N2-N1         | 103.82(19) |
| C1-Au1-Cl1       | -          |

---
